# Supplementary material
Source: PubMed Central journal article supplement (PMC3014570)
Supplement: NIHMS33710-supplement-01.pdf [file NIHMS33710-supplement-01.pdf]

# Supplemental Figure 1

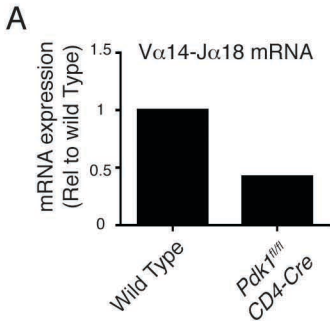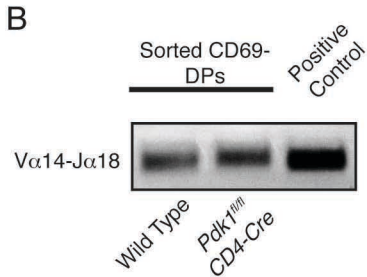

# Supplemental Figure 2

**A**

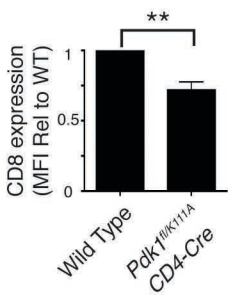

**B**

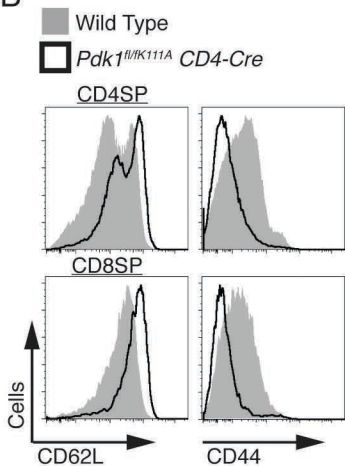

**C**

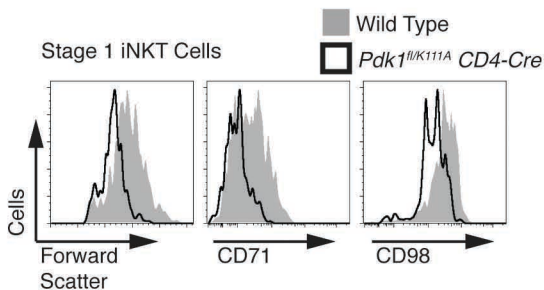

**D**

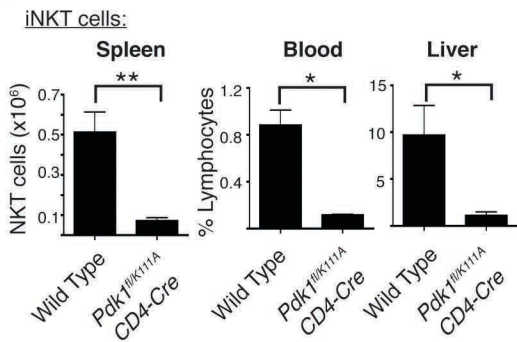

***Supplemental Figure 1: Pdk1<sup>fl/fl</sup> CD4-Cre mice successfully rearrange the TCR $\alpha$  locus to generate the V $\alpha$ 14-J $\alpha$ 18 gene segment.***

*A, B.* Total RNA was purified from sorted CD69- CD4/CD8 DP thymocytes, cDNA generated by rt-PCR and relative frequency of the V $\alpha$ 14-J $\alpha$ 18 transcript determined by quantitative real-time PCR analysis (A) (Primers: V $\alpha$ 14 for; 5'-GGATGACACTGCCACCTACA-3', J $\alpha$ 18 rev; 5'-CTGAGTCCCAGCTCCAAAA-3'). PCR reactions were visualised on an agarose gel (B) (positive control = cultured V $\alpha$ 14 iNKT cells).

***Supplemental Figure 2: Analysis of T cells and iNKT cells in Pdk1<sup>fl/K111A</sup> CD4-Cre mice***

*A.* Expression of CD8 on TCR $\beta^{\text{high}}$ /CD8 SP thymocytes (mean +/- S.E.M of 5 experiments, \*\* p<0.01). *B.* Expression of CD62L and CD44 on TCR $\beta^{\text{high}}$ /CD4 and TCR $\beta^{\text{high}}$ /CD8 SP thymocytes. Data is representative of 3 experiments. *C.* Analysis of the cell size and the expression of CD71 and CD98 on stage 1 iNKT cell progenitors. Data is representative of 2 experiments. *D.* Analysis of total number/frequency of iNKT cells in peripheral tissues. Data is mean +/- S.E.M of 3 experiments (\*\* p<0.01, \* p<0.05).
